# Supplementary material for: Oep23 forms an ion channel in the chloroplast outer envelope
Source: PubMed Central journal article supplement (PMC4331141; doi:10.1186/s12870-015-0445-1), 2015-02-12

**Nycodenz [%]**

|   |    |    |    |
|---|----|----|----|
| 0 | 10 | 15 | 20 |
|---|----|----|----|

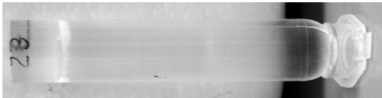

**anti OEP23**

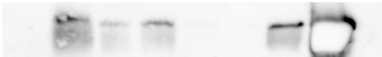

Supplement: 12870_2015_445_MOESM4_ESM.pdf [file 12870_2015_445_MOESM4_ESM.pdf]
